# Supplementary material
Source: publisher figshare collection journal article supplement (https://springernature.figshare.com/ndownloader/files/15550442)

k= 77

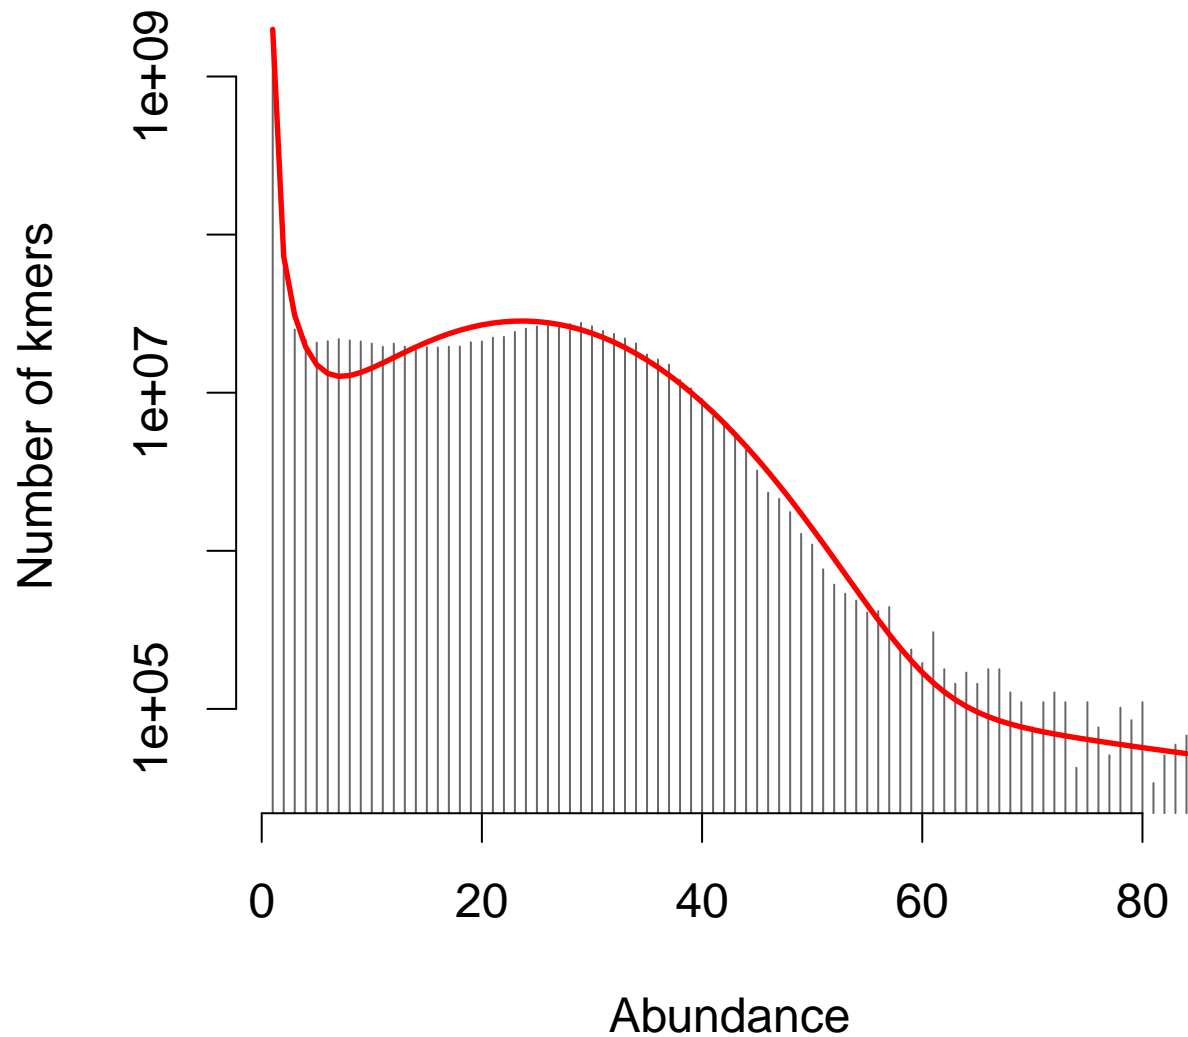

Supplement: Supplementary file 1 [file 15550442]

k= 51

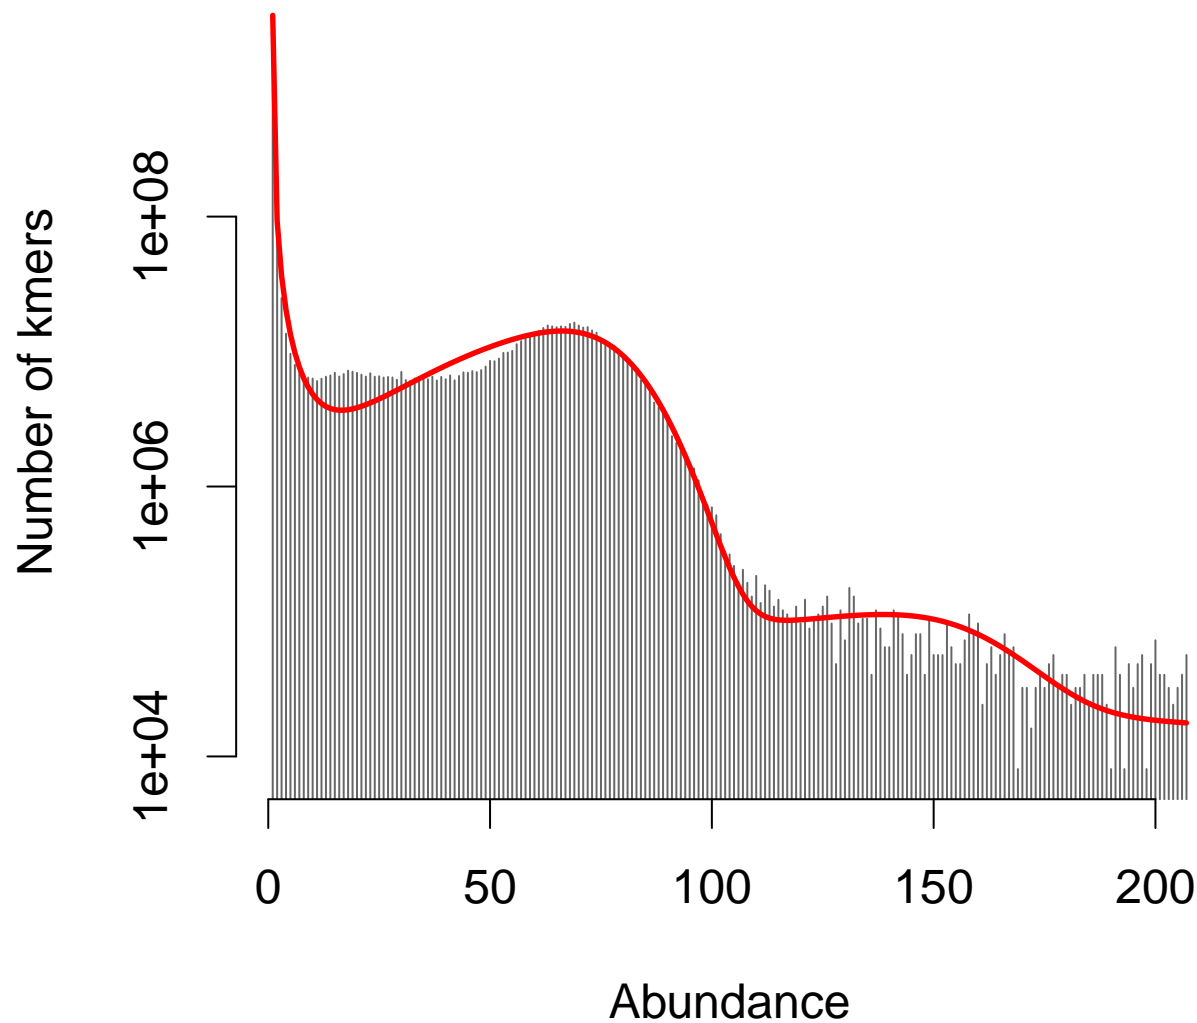

Supplement: Supplementary file 2 [file 15550442]

k= 87

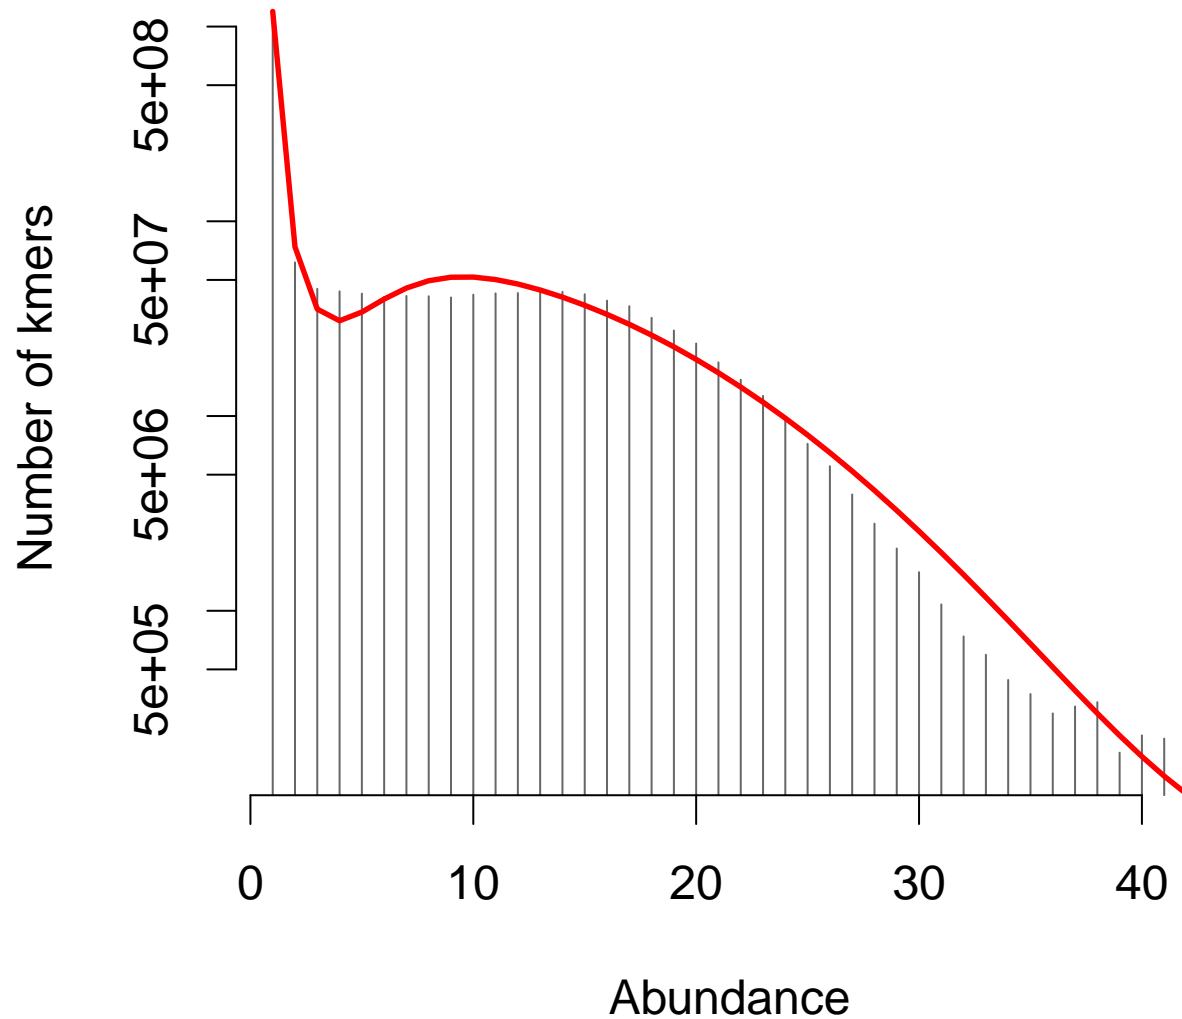

Supplement: Supplementary file 3 [file 15550442]

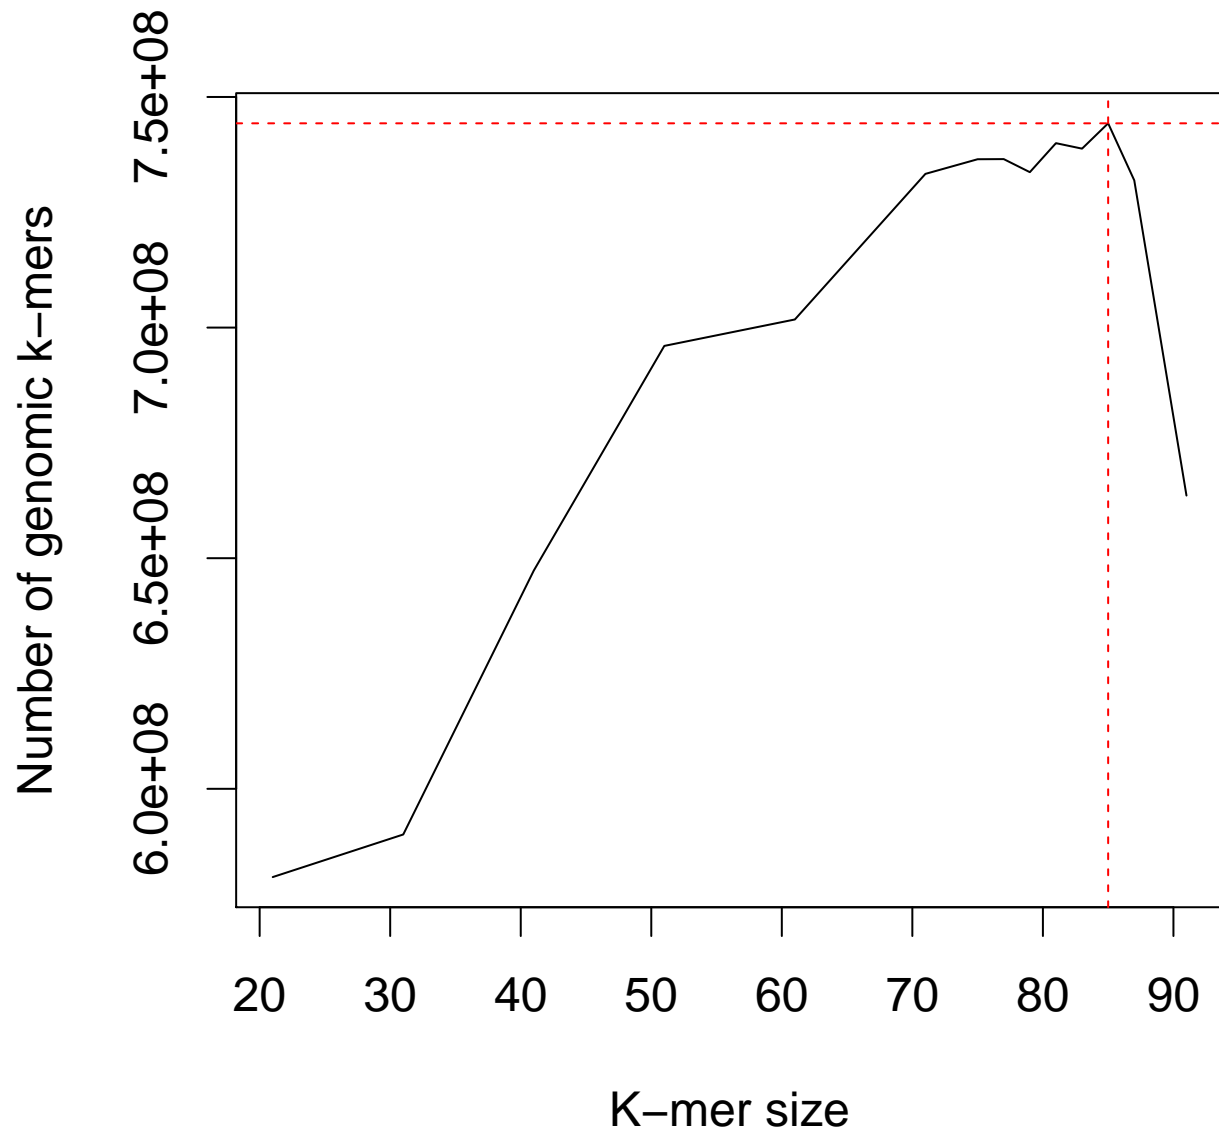

Supplement: Supplementary file 4 [file 15550442]

k= 91

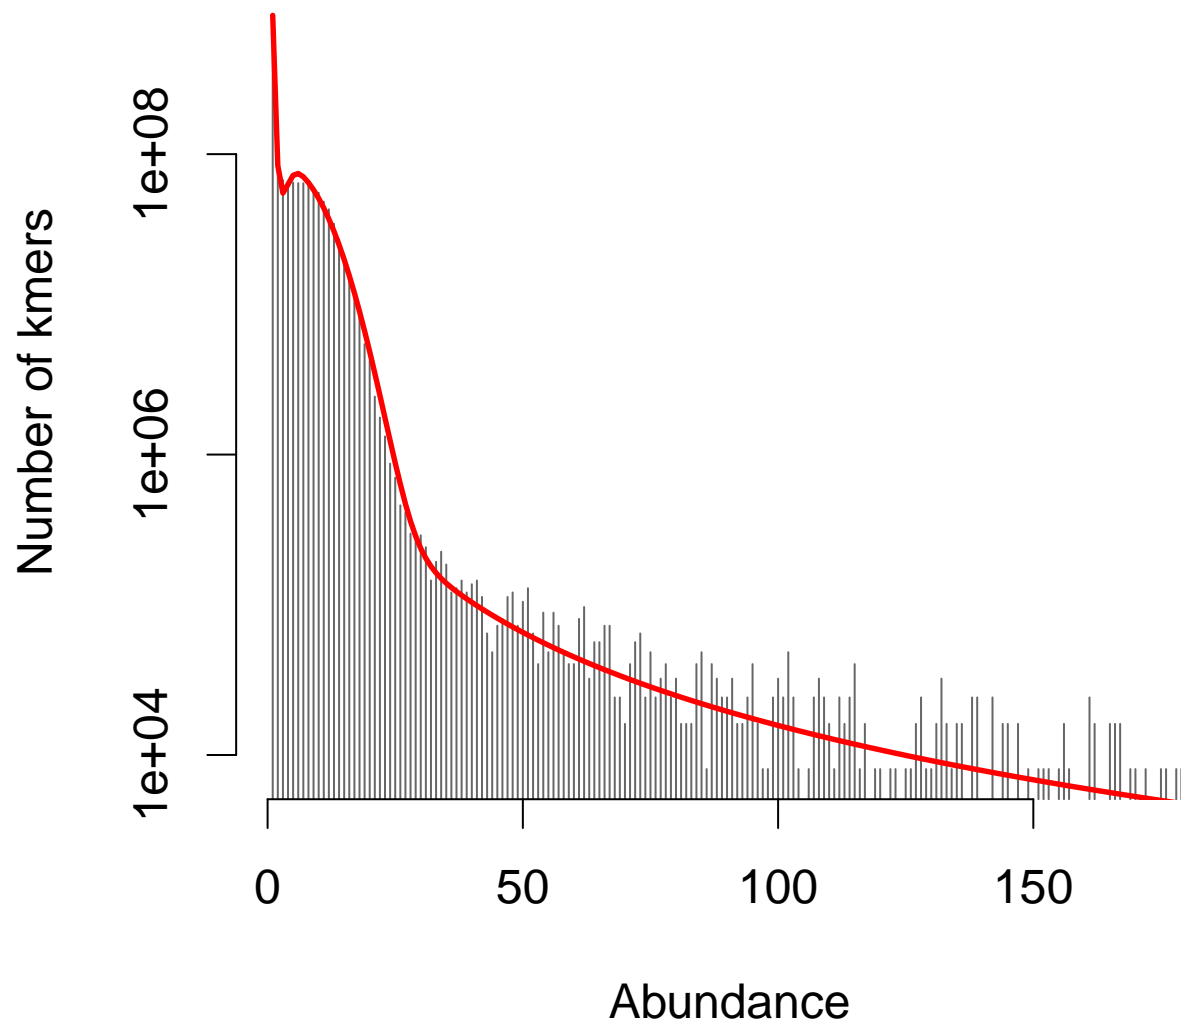

Supplement: Supplementary file 5 [file 15550442]

k= 79

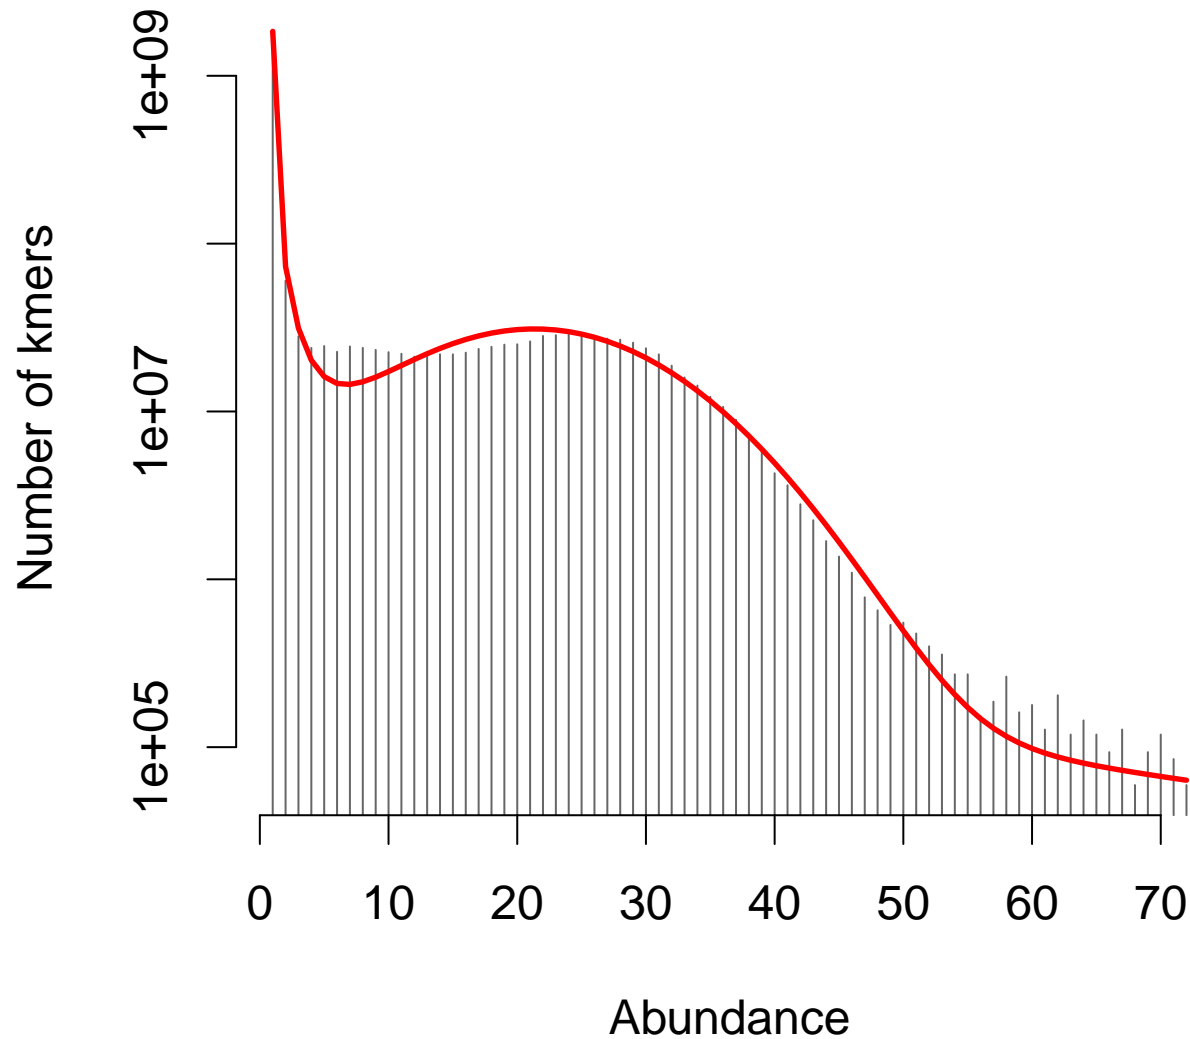

Supplement: Supplementary file 6 [file 15550442]

k= 21

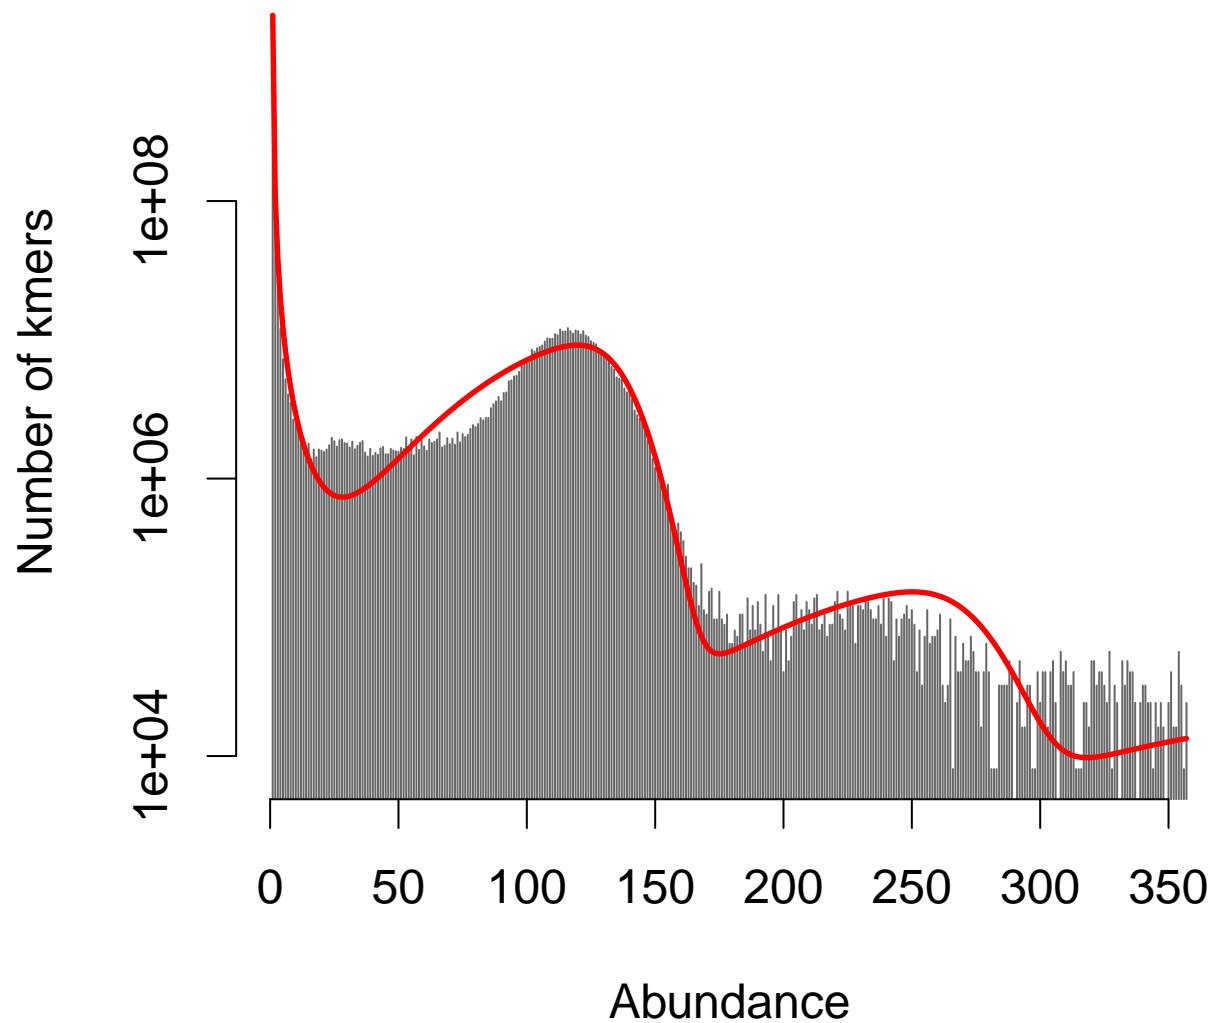

Supplement: Supplementary file 7 [file 15550442]

k= 75

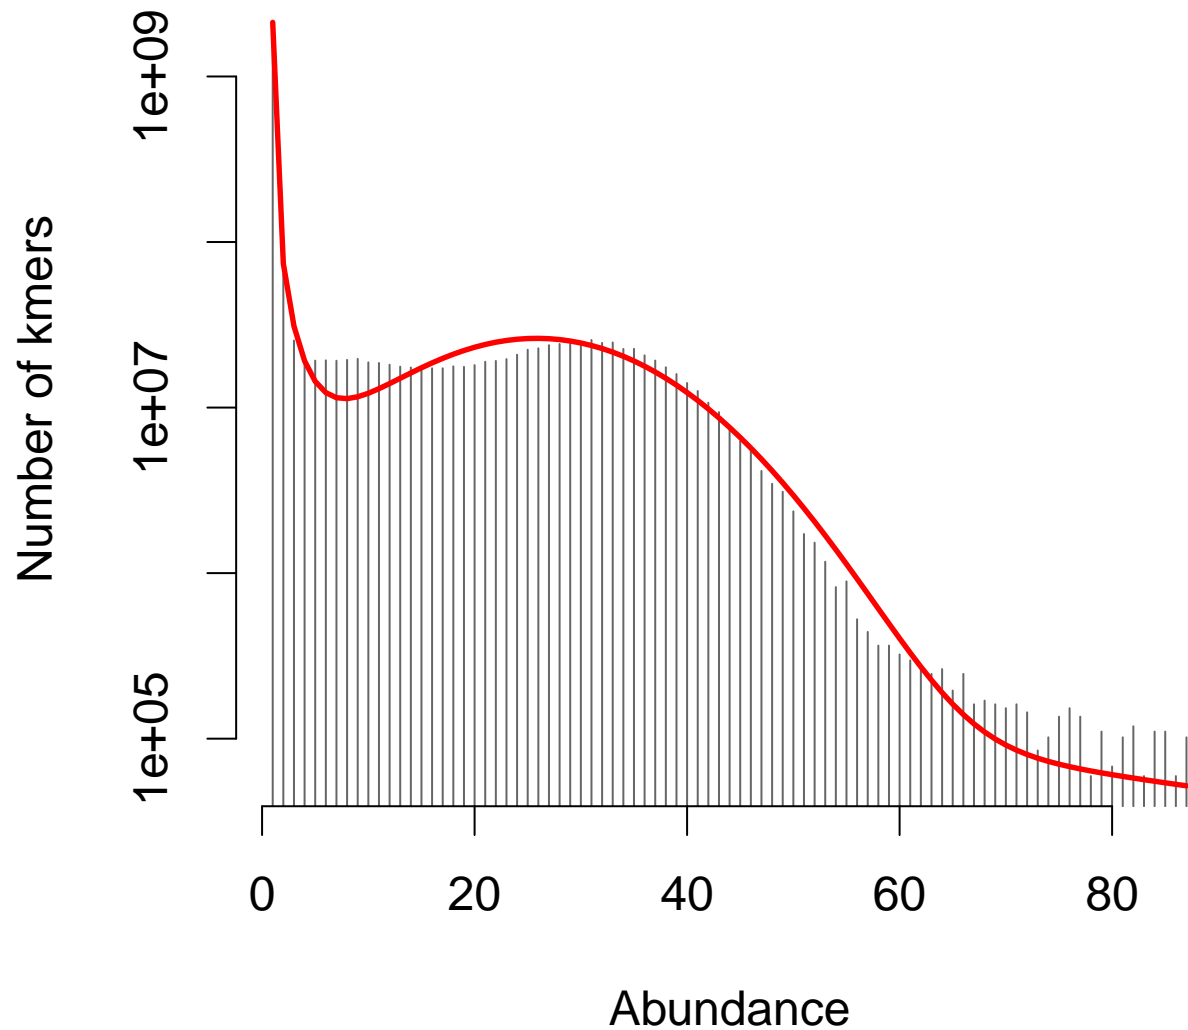

Supplement: Supplementary file 8 [file 15550442]

k= 71

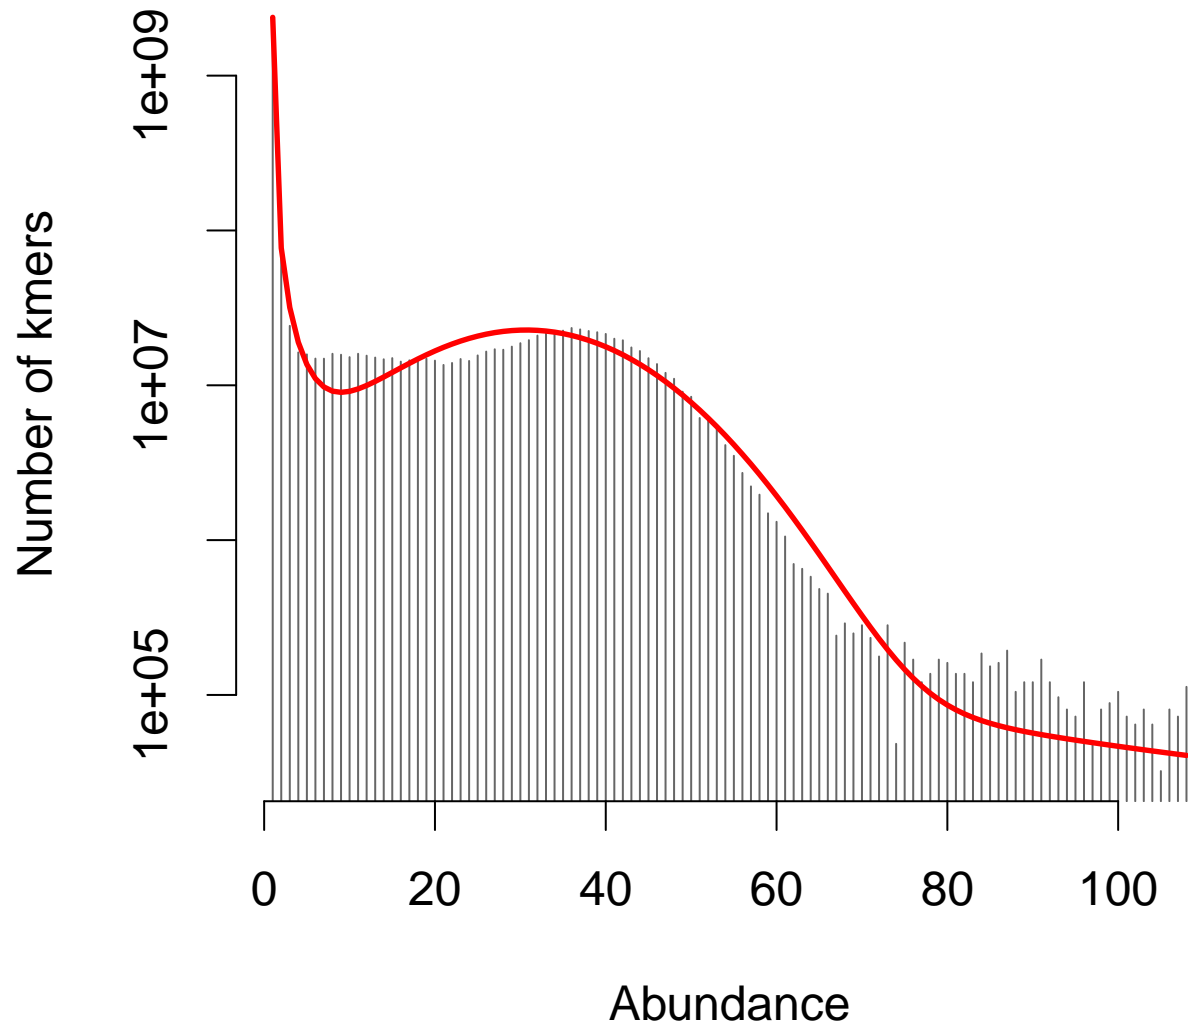

Supplement: Supplementary file 9 [file 15550442]

k= 85

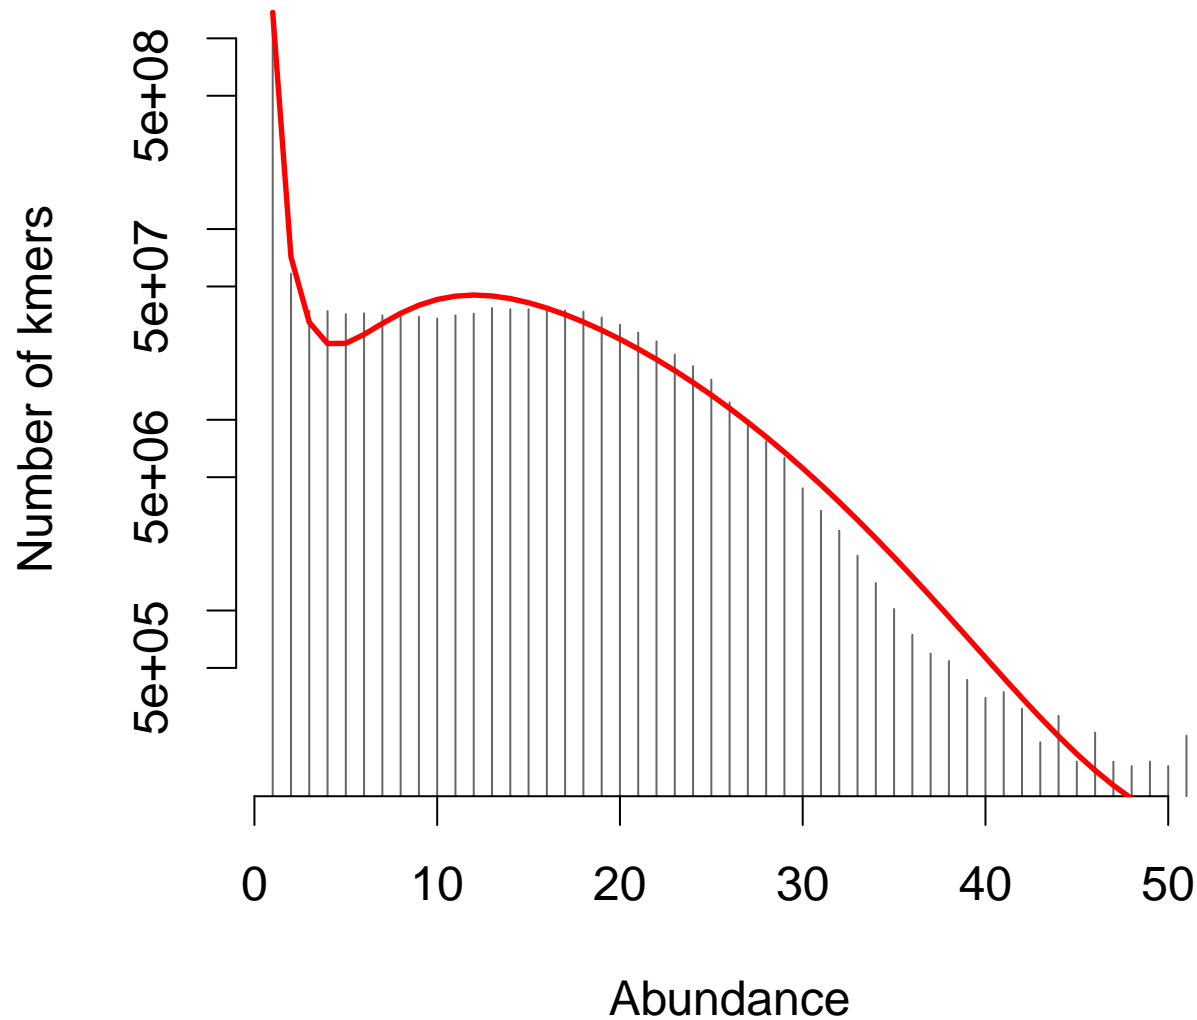

Supplement: Supplementary file 10 [file 15550442]

k= 31

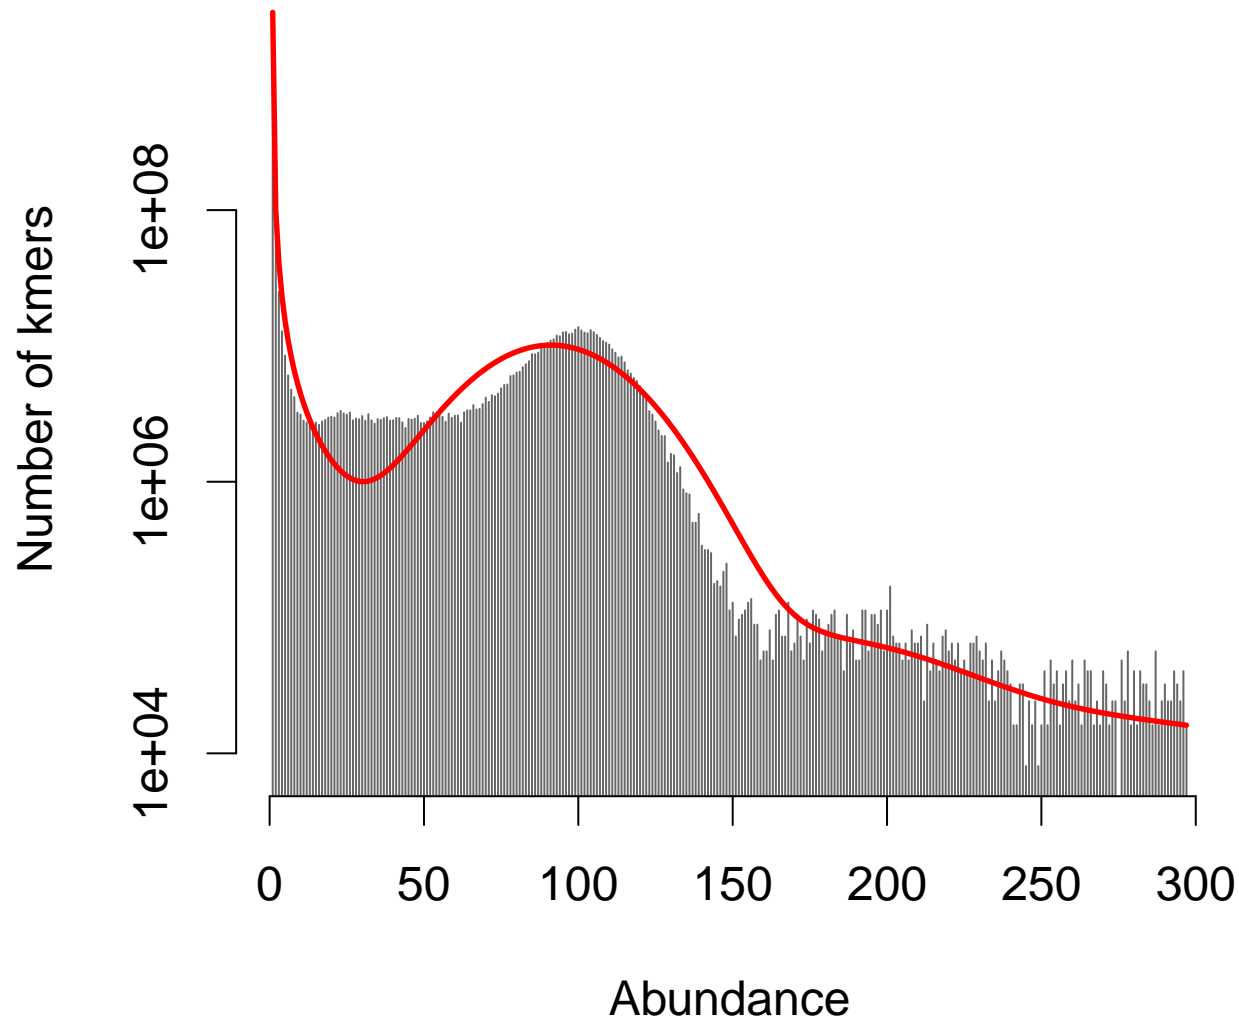

Supplement: Supplementary file 11 [file 15550442]

k= 61

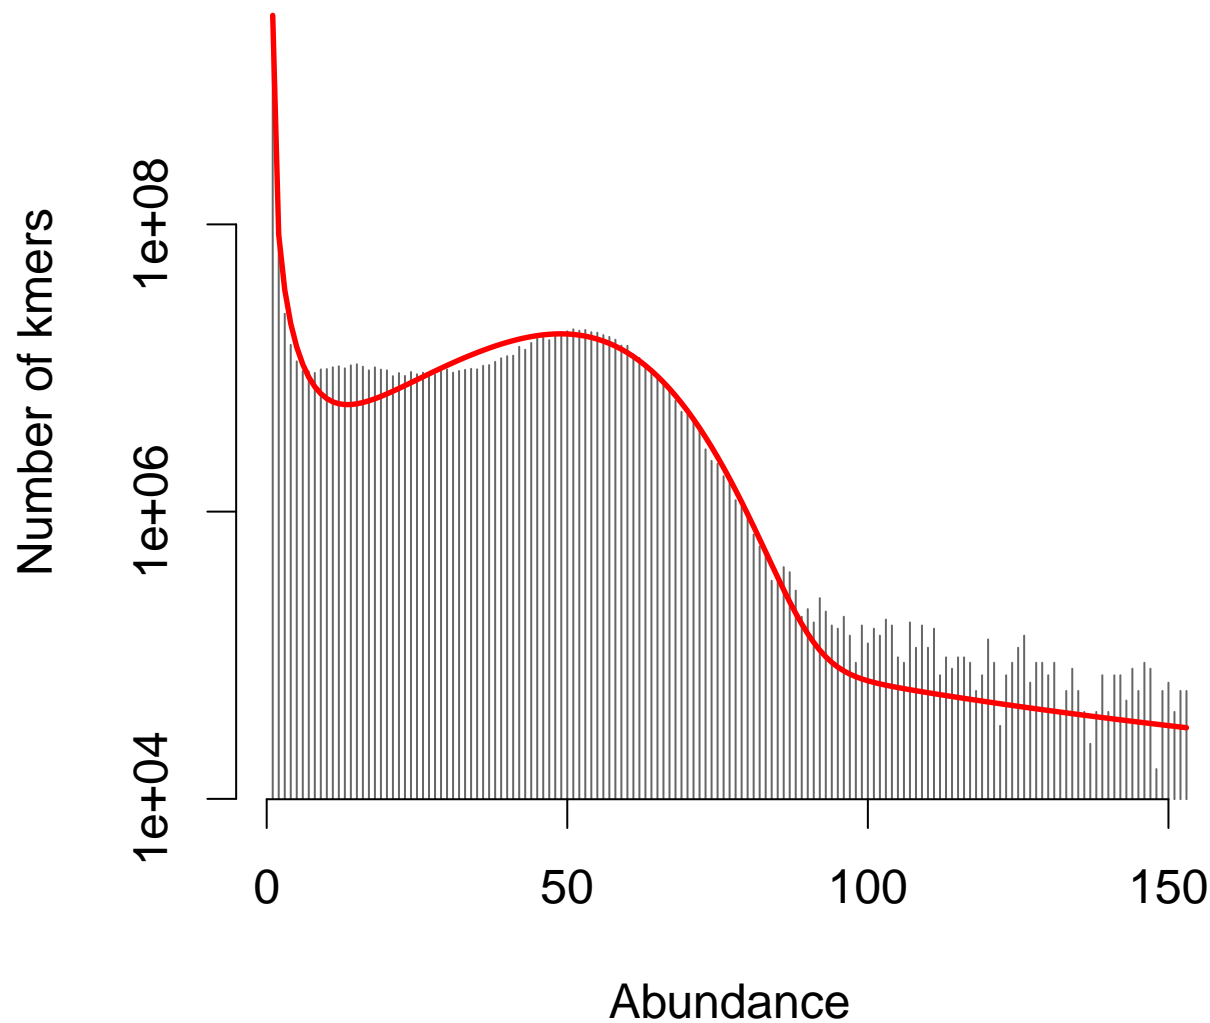

Supplement: Supplementary file 12 [file 15550442]

k= 81

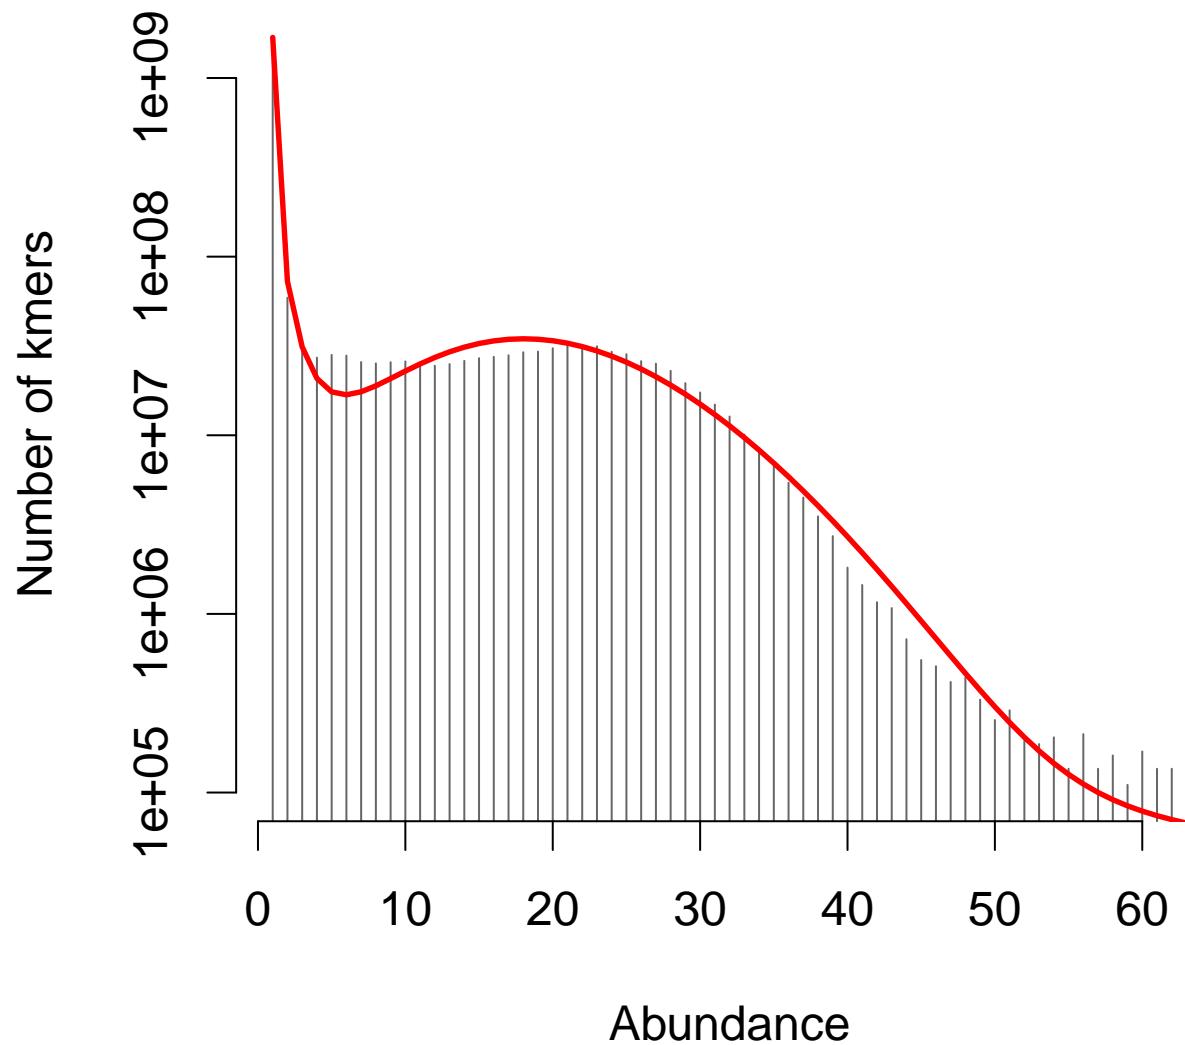

Supplement: Supplementary file 13 [file 15550442]

k= 83

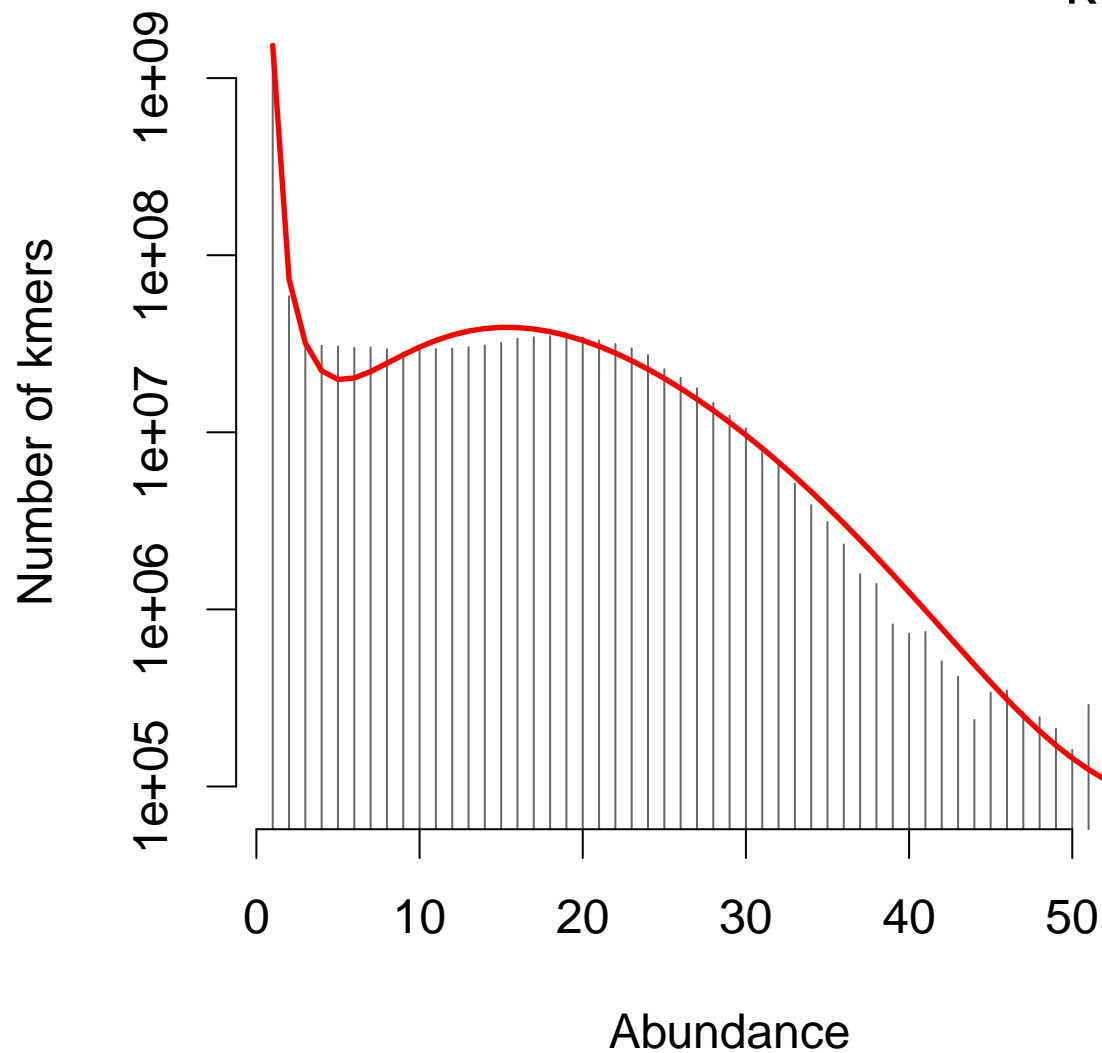

Supplement: Supplementary file 14 [file 15550442]

k= 41

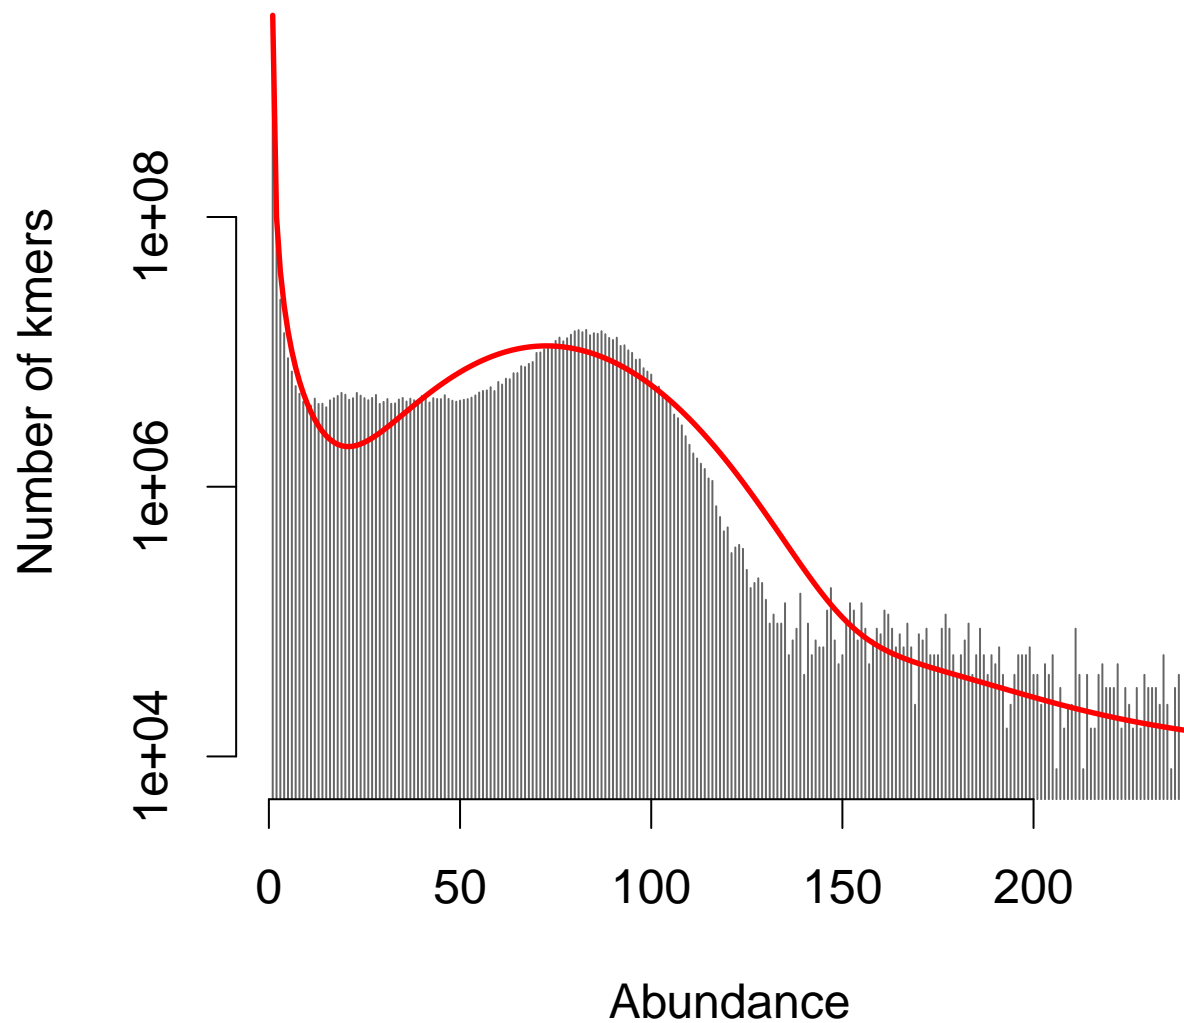

Supplement: Supplementary file 15 [file 15550442]
